# Supplementary material
Source: publisher site journal article supplement (https://www.dovepress.com/article/347713)
Supplement: Supplementary file 1 [file get_supplementary_file.php]

**Supplementary Table 1** Illustrative quotes

| Concept | Patients | Caregivers | Retina Specialists |
| --- | --- | --- | --- |
| **Disease experience** | *“I saw things crooked. I started seeing, for example the tiles wavy. I saw inclined faces on TV. I didn’t see any spot, but it was crooked.”* (Patient 1, nAMD, France). | *“Heavy, heavy, because it’s my dad. But it’s not heavy because I have to do this, it’s not a job for me, it’s heavy because despite the fact that my dad is of a certain age, he’s always my dad, so it’s hard for me to accept this negative development. The health problems, so from an emotional point of view, it’s been hard on me.”* (Caregiver 1, nAMD, Italy) |  |
| **Adherence to anti-VEGF intravitreal injections** | *"I did stop treatment in 2019, for a period when my mother passed away [...] but other than that, no, I’ve not missed any appointments."* (Patient 2, DME, Canada) | *“No, we’ve [never missed an appointment]. This treatment is far too critical for us to want to do something like that.”* (Caregiver 2, DME, Canada) | *Well, I do not really measure it [adherence]. But you get a feeling for those who show up again, and for those who fail to come again. And for those who fail, you ask your resident, ‘I haven't seen him for a long time. Where is he? Or have you, have you seen him? Or did he have his injections? Or should we give him a call?’ These are those special patients who are maybe, they may be suspect not to show you, you know? And you have an eye on them, you know? And the others, you feel, ‘No, he will do it.’ […] It's a little bit like that.”* (Retina specialist 1, Germany) |
| **Drivers for following management plan (adherence)** | *“I’m confident in the doctor, I’m confident in the treatment and I have the support of my husband and you know we just do the best we can.”* (Patient 3, nAMD, United States) | *“Appointments are easily set. They always call her because she is the one who attends the visits so they either contact her over the phone or send her a letter from the hospital with the appointment date.”* (Caregiver 3, DME, Spain)  *“He feels the injection but it depends on who does the injection but in general, I think they try to put the same person each time.”* (Caregiver 4, DME, France) | *“I think that, if you explain it well, it’s a reason for them to come back. You explain that if they don’t come back to continue with the treatment, they’re going to go back to how they were before.”* (Retina specialist 2, Spain)  *These patients are desperate for their vision and they realize how important it is that they keep their...you know, appointments in order to make sure that they don't lose their vision. So, I have very few no-shows or cancellations because of that.”* (Retina specialist 3, United States) |
| **Barriers to following management plan (adherence)** | *“It takes me a lot of time because I have to go to [City], […] the nurse that prepares me or the assistant […] I only see him for ten minutes. Half a day, it takes me half a day but it takes him ten minutes.”* (Patient 4, nAMD, France)  *“I feel like my eyes are worse now than when they- than they were in the beginning. […] I think it’s the medication.”* (Patient 5, DME, United States) | *“It may be different in a city with many eye doctors, but in our region, you can consider yourself lucky if you get an appointment.”* (Caregiver 5, nAMD, Germany) | *“I think that the main reasons are two. The first one related to theoverall condition of the patient. If he is very old, if he is alone, so he cannot be assisted by someone […] The second reason as I told you before is time dependent. So in the beginning all the patients are very happy with the injection. After 5, 6 years, so it’s variable, but this enthusiasm broke down.”* (Retina specialist 4, Italy)  *"There are patients who are very afraid of needles and getting a shot in their eye is very upsetting to them."* (Retina specialist 5, Spain) |

**Supplementary Table 2** Drivers to follow treatment management plan as reported by nAMD and DME patients and caregivers

| Drivers to follow treatment management plan* | Patients | | Caregivers | |
| --- | --- | --- | --- | --- |
| **nAMD**  **(n=49)** | **DME**  **(n=46)** | **nAMD**  **(n=47)** | **DME**  **(n=33)** |
| Ability to book an appointment | 15 (31%) | 7 (15%) | 14 (30%) | 11 (33%) |
| Involvement of caregiver (motivation & advice) | 3 (6%) | 3 (7%) | 15 (32%) | 10 (30%) |
| Overall treatment effectiveness | 19 (39%) | 15 (33%) | 11 (23%) | 9 (27%) |
| Travel logistics | 12 (24%) | 7 (15%) | 9 (19%) | 6 (18%) |
| Doctor-Patient relationship | 39 (80%) | 28 (61%) | 9 (19%) | 5 (15%) |
| Forgets appointment/trouble remembering | 3 (6%) | 2 (4%) | 3 (6%) | 4 (12%) |
| Frequency of visits | 15 (31%) | 11 (24%) | 10 (21%) | 3 (9%) |
| Feelings about losing vision (e.g., fear/anxiety) | 7 (14%) | 9 (20%) | 5 (11%) | 2 (6%) |
| Quality of medical care | 6 (12%) | 13 (28%) | 2 (4%) | 2 (6%) |
| Appointment frequency changed over time (e.g., Treat and extend) | 7 (14%) | 1 (2%) | 1 (2%) | 1 (3%) |
| Feelings about injection (e.g., fear/anxiety) | 5 (10%) | 2 (4%) | 1 (2%) | 0 (0%) |
| Education on treatment purpose, risk and procedures | 14 (29%) | 21 (46%) | 0 (0%) | 0 (0%) |

**Reported if at least 10% in one of the samples*

**Supplementary Table 3** Barriers to follow treatment management plan as reported by nAMD and DME patients and caregivers

| Barriers to follow treatment management plan* | Patients | | Caregivers | |
| --- | --- | --- | --- | --- |
| **nAMD**  **(n=49)** | **DME**  **(n=46)** | **nAMD**  **(n=47)** | **DME**  **(n=33)** |
| Most common side effects, including pain | 37 (76%) | 27 (59%) | 29 (62%) | 24 (73%) |
| Fear/anxiety about injection | 23 (47%) | 29 (63%) | 20 (43%) | 14 (42%) |
| Financial burden of treatment | 4 (8%) | 5 (11%) | 5 (11%) | 8 (24%) |
| Frequency of visits | 11 (22%) | 13 (28%) | 7 (15%) | 7 (21%) |
| Overall treatment effectiveness | 6 (12%) | 9 (20%) | 6 (13%) | 7 (21%) |
| Travel logistics | 11 (22%) | 9 (20%) | 9 (19%) | 6 (18%) |
| Education on treatment purpose, risk and procedures | 12 (24%) | 8 (17%) | 5 (11%) | 5 (15%) |
| Temporary decrease in visual acuity | 3 (6%) | 3 (7%) | 1 (2%) | 5 (15%) |
| Cost for travel to appointment | 6 (12%) | 2 (4%) | 2 (4%) | 4 (12%) |
| Quality of medical care | 7 (14%) | 7 (15%) | 1 (2%) | 4 (12%) |
| Waiting time before visit | 7 (14%) | 5 (11%) | 7 (15%) | 3 (9%) |
| Ability to book an appointment | 4 (8%) | 7 (15%) | 3 (6%) | 2 (6%) |
| Doctor-Patient relationship | 11 (22%) | 6 (13%) | 5 (11%) | 1 (3%) |
| Separate monitoring and injection visits | 5 (10%) | 1 (2%) | 0 (0%) | 1 (3%) |

**Reported if at least 10% in one of the samples*

**Supplementary Table 4** Treatment barriers reported by patients as having a negative impact on adherence by country

| Treatment barriers with a negative impact on adherence above 10% of full sample of patients* | Overall  (n=94) | USA  (n=18) | Canada  (n=16) | Spain  (n=15) | France  (n=20) | Germany  (n=20) | Italy  (n=5) |
| --- | --- | --- | --- | --- | --- | --- | --- |
| Most common side effects, including pain | 63 (67%) | 12  (67%) | 12  (75%) | 12  (80%) | 13  (65%) | 12  (60%) | 2  (40%) |
| Feelings about injection (e.g., fear/anxiety) | 51  (54%) | 11  (61%) | 8  (50%) | 10  (67%) | 14  (70%) | 6  (30%) | 2  (40%) |
| Frequency of visits | 24  (26%) | 6  (33%) | 4  (25%) | 3  (20%) | 7  (35%) | 4  (20%) | 0  (0%) |
| Education on treatment purpose, risk and procedures | 20  (21%) | 5  (28%) | 5  (31%) | 2  (13%) | 2  (10%) | 6  (30%) | 0  (0%) |
| Travel logistics | 19  (20%) | 6  (33%) | 5  (31%) | 1  (7%) | 5  (25%) | 2  (10%) | 0  (0%) |
| Doctor-Patient relationship & other human factors | 17  (18%) | 4  (22%) | 5  (31%) | 3  (20%) | 1  (5%) | 3  (15%) | 1  (20%) |
| Overall treatment effectiveness; does patient think treatment works? | 15  (16%) | 3  (17%) | 5  (31%) | 2  (13%) | 3  (15%) | 0  (0%) | 2  (40%) |
| Quality of medical care | 14  (15%) | 0  (0%) | 4  (25%) | 4  (27%) | 0  (0%) | 5  (25%) | 1  (20%) |
| Ability to book an appointment, including booking in advance | 11  (12%) | 3  (17%) | 3  (19%) | 1  (7%) | 1  (5%) | 3  (15%) | 0  (0%) |
| Waiting time before visit | 11  (12%) | 3  (17%) | 4  (25%) | 1  (7%) | 3  (15%) | 0  (0%) | 0  (0%) |

**Reported if at least 10% of the overall sample*

**Supplementary Table 5** Treatment barriers reported by caregivers as having a negative impact on adherence by country

| Treatment barriers with a negative impact on adherence above 10% of full sample of caregivers* | Overall  (n=79) | USA  (n=19) | Canada  (n=11) | Spain  (n=9) | France  (n=10) | Germany  (n=20) | Italy  (n=10) |
| --- | --- | --- | --- | --- | --- | --- | --- |
| Most common side effects, including pain | 52  (66%) | 13  (68%) | 8  (73%) | 6  (67%) | 6  (60%) | 14  (70%) | 5  (50%) |
| Feelings about injection (e.g., fear/anxiety) | 33  (42%) | 8  (42%) | 3  (27%) | 5  (56%) | 6  (60%) | 8  (40%) | 3  (30%) |
| Travel logistics | 15  (19%) | 2  (11%) | 4  (36%) | 2  (22%) | 1  (10%) | 3  (15%) | 3  (30%) |
| Frequency of visits | 14  (18%) | 2  (11%) | 4  (36%) | 4  (44%) | 2  (20%) | 2  (10%) | 0  (0%) |
| Overall treatment effectiveness; does patient think treatment works? | 12  (15%) | 3  (16%) | 3  (27%) | 1  (11%) | 3  (30%) | 1  (5%) | 1  (10%) |
| Financial burden of treatment | 12  (15%) | 4  (21%) | 2  (18%) | 2  (22%) | 2  (20%) | 2  (10%) | 0  (0%) |
| Education on treatment purpose, risk and procedures | 10  (13%) | 0  (0%) | 3  (27%) | 1  (11%) | 1  (10%) | 4  (20%) | 1  (10%) |
| Waiting time before visit | 9  (11%) | 0  (0%) | 2  (18%) | 1  (11%) | 3  (30%) | 2  (10%) | 1  (10%) |

**Reported if at least 10% of the overall sample*

**Supplementary Table 6** Treatment barriers reported by retina specialists as having a negative impact on adherence by country

| Treatment barriers with a negative impact on adherence ranked in top 3* | Overall  (n=62) | USA  (n=12) | Canada  (n=10) | Spain  (n=10) | France  (n=10) | Germany  (n=10) | Italy  (n=10) |
| --- | --- | --- | --- | --- | --- | --- | --- |
| Travel logistics | 23  (37%) | 2  (17%) | 7  (70%) | 5  (50%) | 4  (40%) | 3  (30%) | 2  (20%) |
| Financial burden of treatment, including insurance coverage | 18  (29%) | 10  (83%) | 3  (30%) | 4  (40%) | 0  (0%) | 0  (0%) | 1  (10%) |
| Serious comorbidities (permanent) | 15  (24%) | 2  (17%) | 4  (40%) | 3  (30%) | 1  (10%) | 3  (30%) | 2  (20%) |
| Fear/anxiety about injection | 13  (21%) | 3  (25%) | 0  (0%) | 1  (10%) | 2  (20%) | 4  (40%) | 3  (30%) |
| Overall effectiveness of treatment | 11  (18%) | 1  (8%) | 0  (0%) | 3  (30%) | 1  (10%) | 3  (30%) | 3  (30%) |
| Patient education (understand disease & treatment purpose) | 8  (13%) | 0  (0%) | 3  (30%) | 2  (20%) | 1  (10%) | 0  (0%) | 2  (20%) |
| Injection-related side effects, including pain | 7  (11%) | 1  (8%) | 1  (10%) | 1  (10%) | 1  (10%) | 2  (20%) | 1  (10%) |
| Frequency of visits | 7  (11%) | 0  (0%) | 1  (10%) | 1  (10%) | 2  (20%) | 3  (30%) | 0  (0%) |

**Reported if at least 10% of the overall sample*
